# Supplementary material for: Alphacoronaviruses Are Common in Bats in the Upper Midwestern United States
Source: MDPI journal article supplement (doi:10.3390/v14020184), 2022-01-19
Supplement: s1 [file s1]

**Table S1.** Predicted sizes for *Eptesicus* bat CoV non-structural proteins derived from polyprotein ORF1ab. \*, incomplete sequence.

| <b>EbCoV Strain</b> | <b>Nsp1</b> | <b>Nsp2</b> | <b>Nsp3</b> | <b>Nsp4</b> | <b>Nsp5</b> | <b>Nsp6</b> | <b>Nsp7</b> | <b>Nsp8</b> | <b>Nsp9</b> | <b>Nsp10</b> | <b>Nsp11/12</b> | <b>Nsp13</b> | <b>Nsp14</b> | <b>Nsp15</b> | <b>Nsp16</b> |
|---------------------|-------------|-------------|-------------|-------------|-------------|-------------|-------------|-------------|-------------|--------------|-----------------|--------------|--------------|--------------|--------------|
| 15593               | 282         | 608         | 1704        | 479         | 302         | 279         | 83          | 195         | 109         | 135          | 927             | 597          | 519          | 347          | 300          |
| 15075               | 82*         | 608         | 1704        | 479         | 302         | 279         | 83          | 195         | 109         | 135          | 927             | 597          | 519          | 347          | 300          |
| 15712               | 282         | 608         | 1702        | 479         | 302         | 279         | 83          | 195         | 109         | 135          | 927             | 597          | 519          | 347          | 300          |
| 16842               | 82*         | 608         | 1704        | 479         | 302         | 279         | 83          | 195         | 109         | 135          | 927             | 597          | 519          | 347          | 300          |
| 16964               | 282         | 608         | 1702        | 479         | 302         | 279         | 83          | 195         | 109         | 135          | 927             | 597          | 519          | 347          | 300          |
| 14300               | 82*         | 608         | 1703        | 479         | 302         | 279         | 83          | 195         | 109         | 135          | 927             | 597          | 519          | 347          | 300          |

**Table S2.** Predicted cleavage sites for the non-structural proteins (nsp) of *Eptesicus* bat coronavirus

| <b>nsp</b> | <b>Cleavage site</b> |
|------------|----------------------|
| nsp2       | SSLQ AGLR            |
| nsp3       | VTLQ SGRK            |
| nsp4       | SSVQ SKLT            |
| nsp5       | AMLQ SIAS            |
| nsp6       | VKLQ NNEV            |
| nsp7       | IRLQ AGKQ            |
| nsp9       | ANVQ SFDQ            |
| nsp10      | TVLQ ASGM            |
| nsp11      | TDLQ ATEG            |
| nsp12      | TKIQ GLEN            |
| nsp13      | PQLQ SAEW            |
