# Supplementary figures and images for: Alphacoronaviruses Are Common in Bats in the Upper Midwestern United States
Source: MDPI journal article supplement (doi:10.3390/v14020184), 2022-01-19

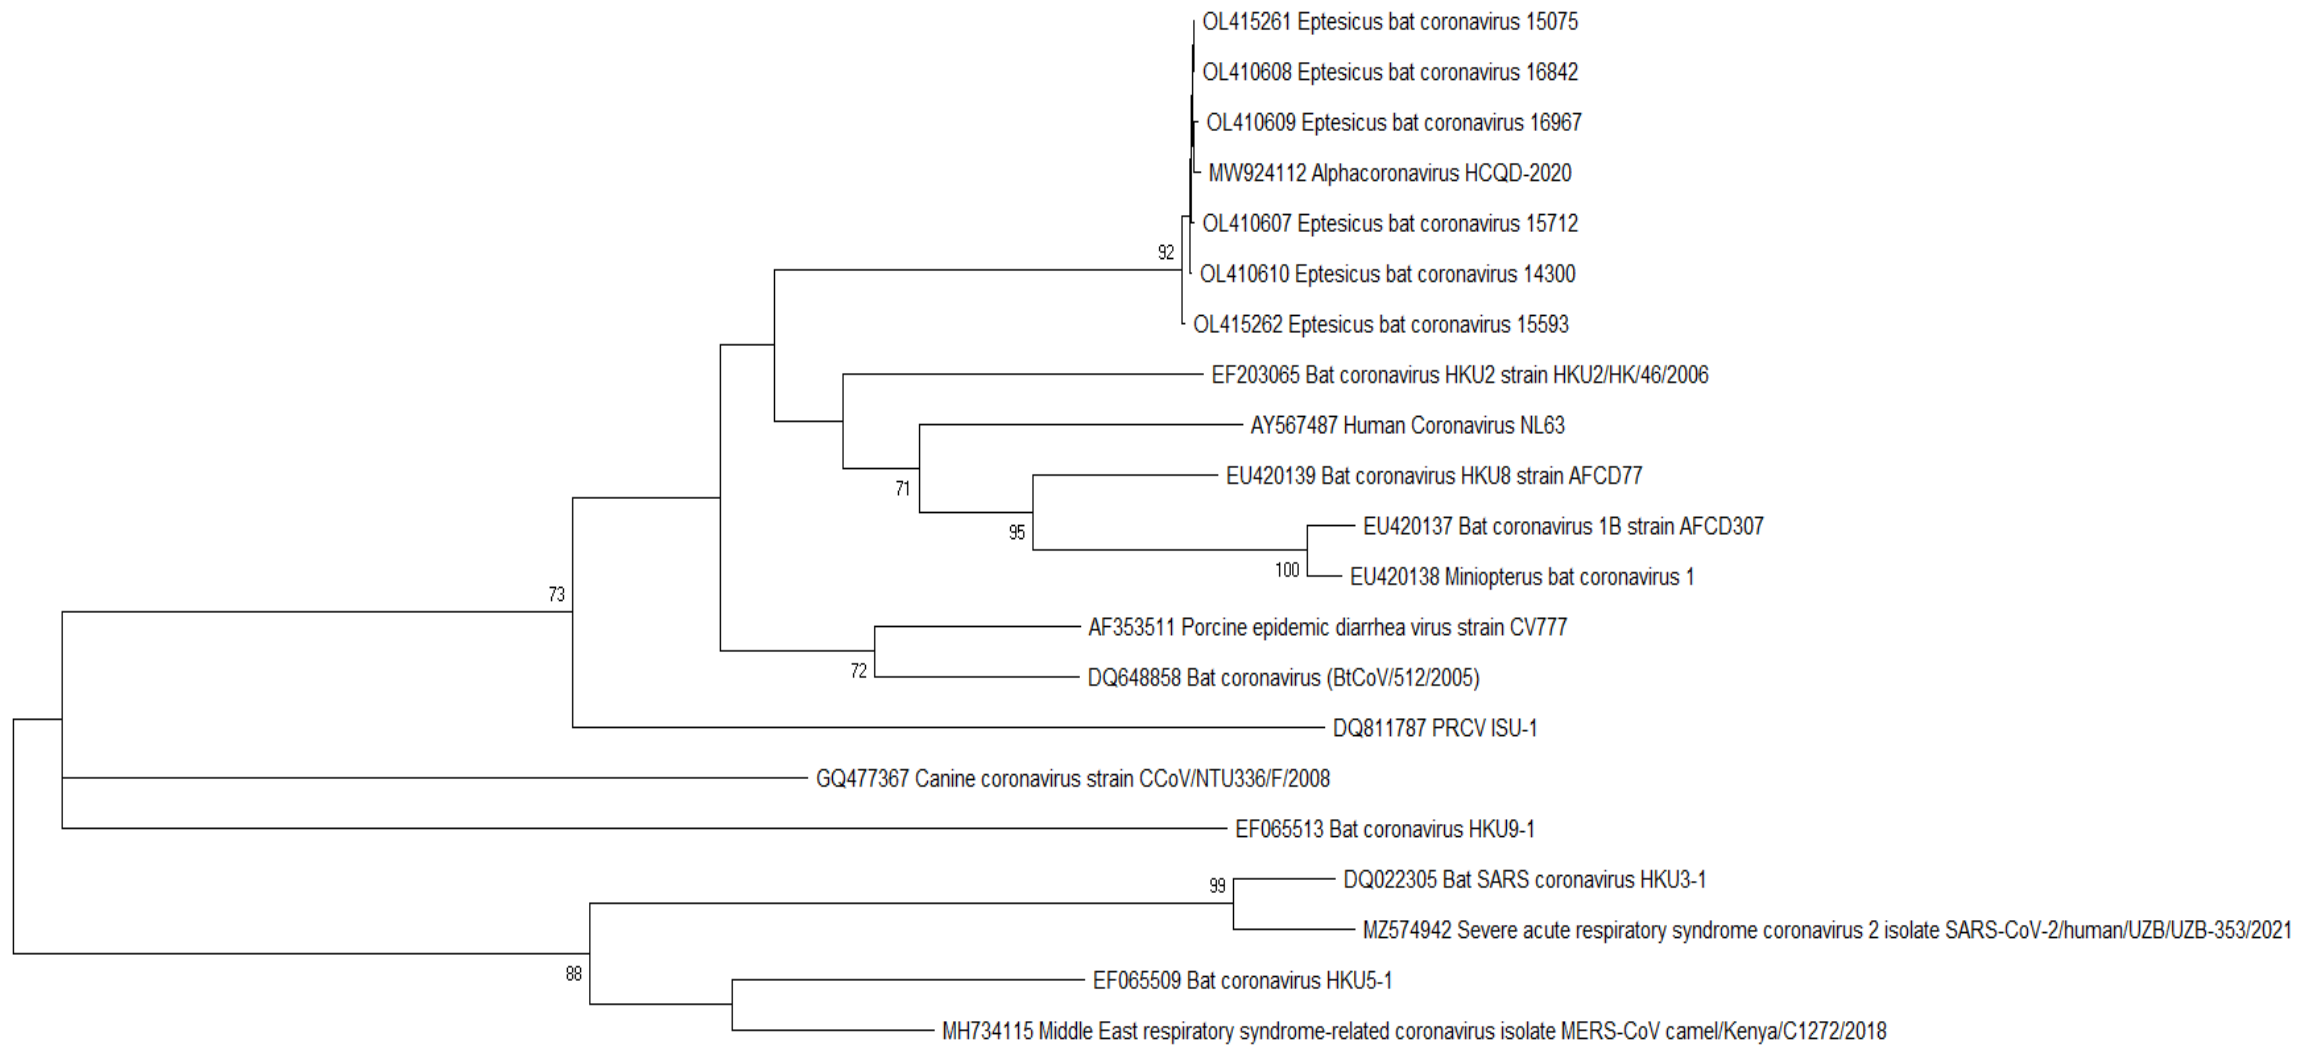

0.50

Supplement: s1 [file s1]

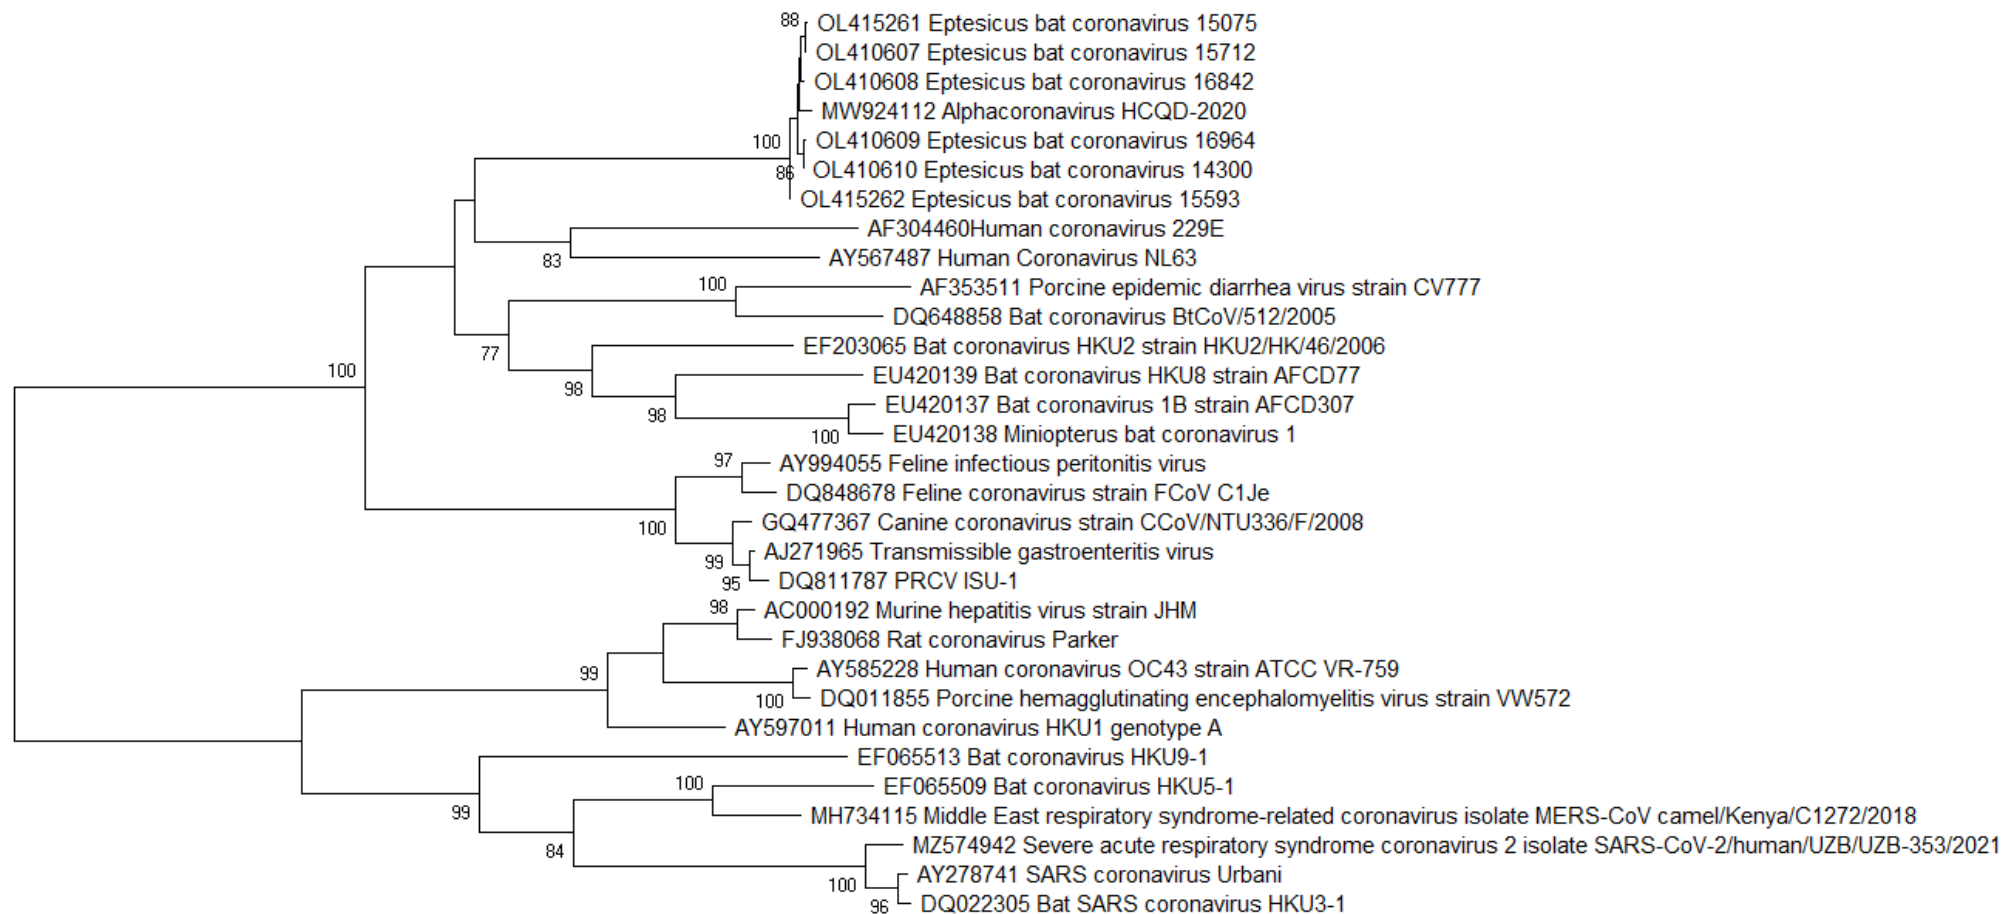

Supplement: s1 [file s1]

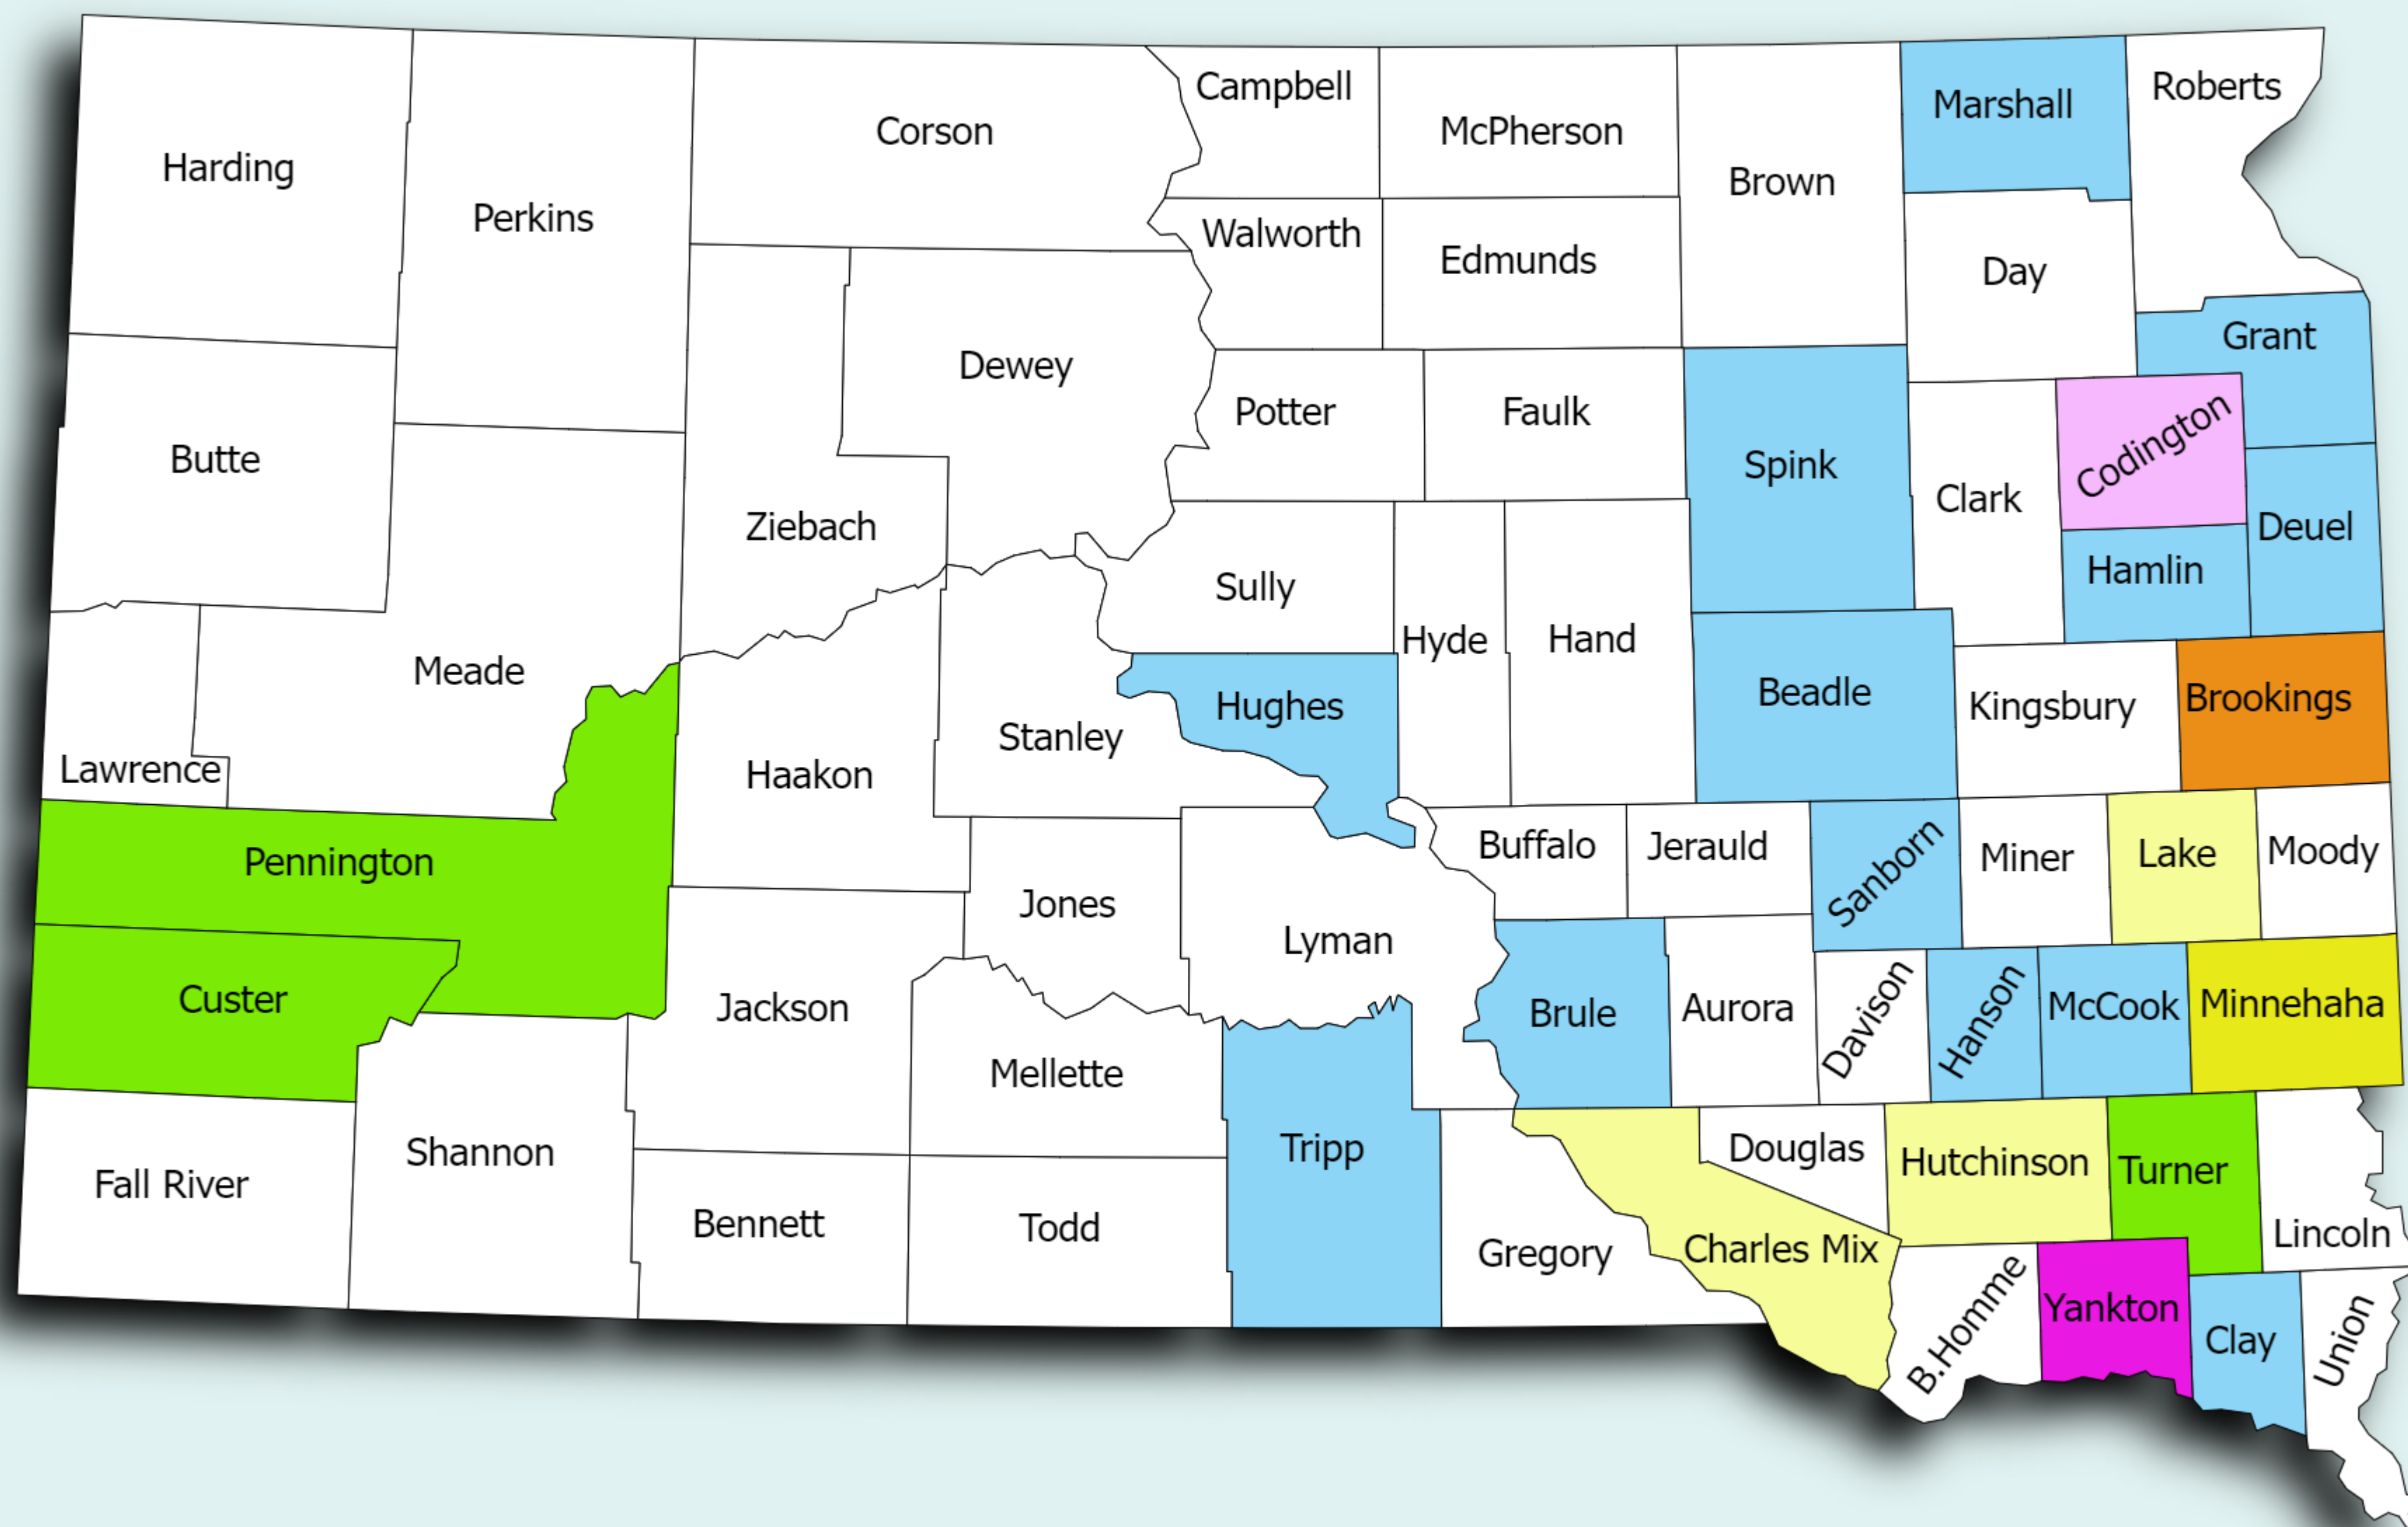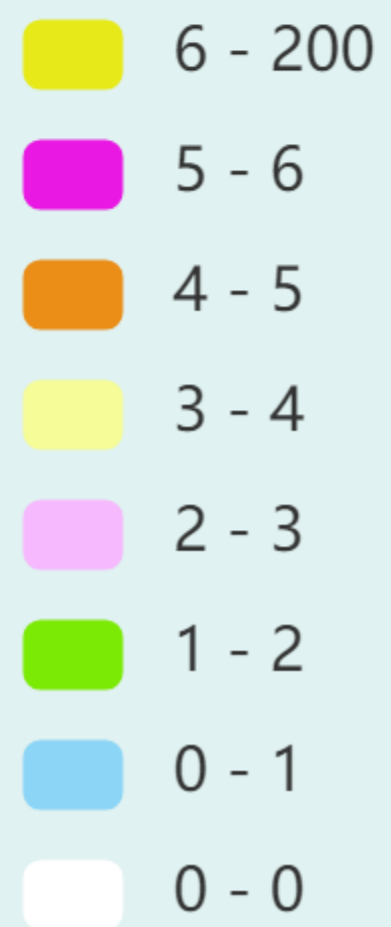

Supplement: s1 [file s1]

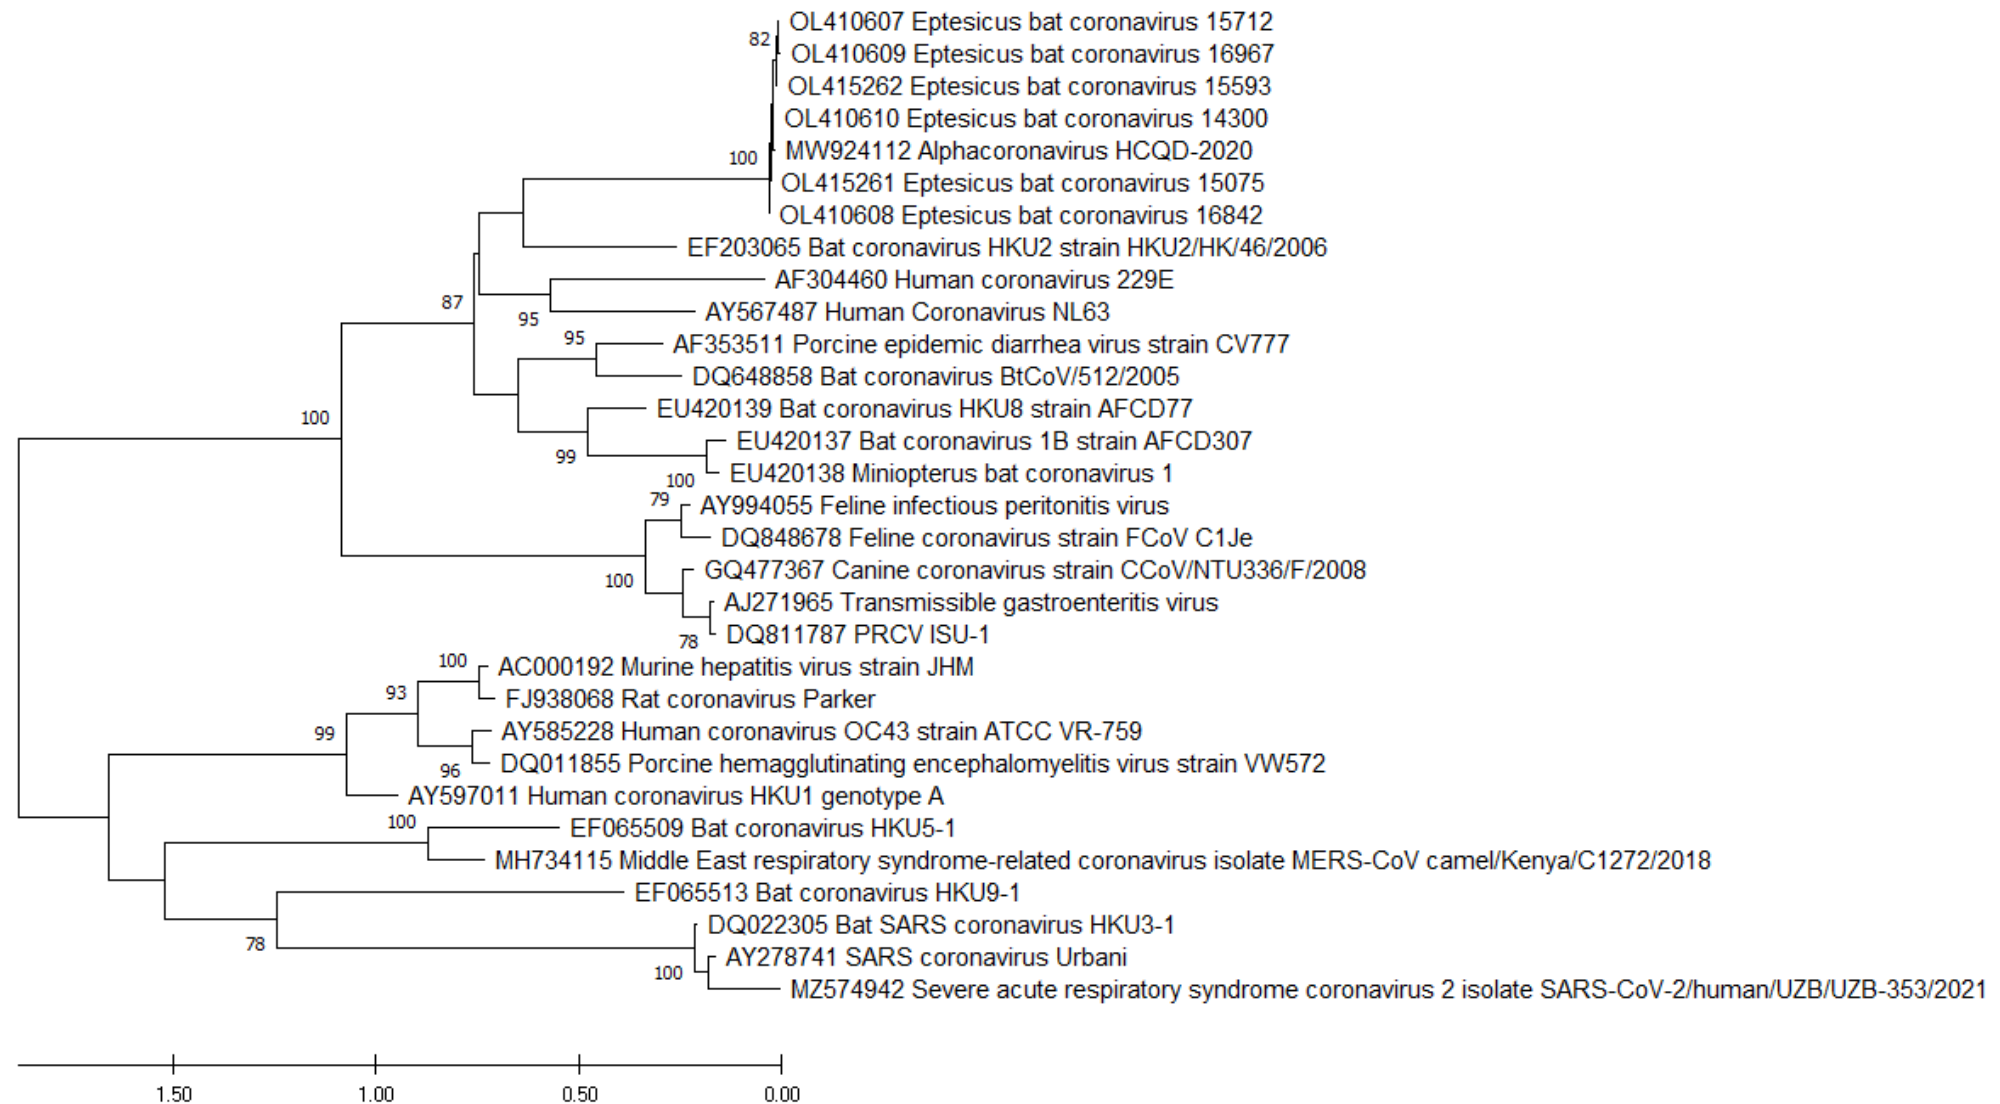

Supplement: s1 [file s1]

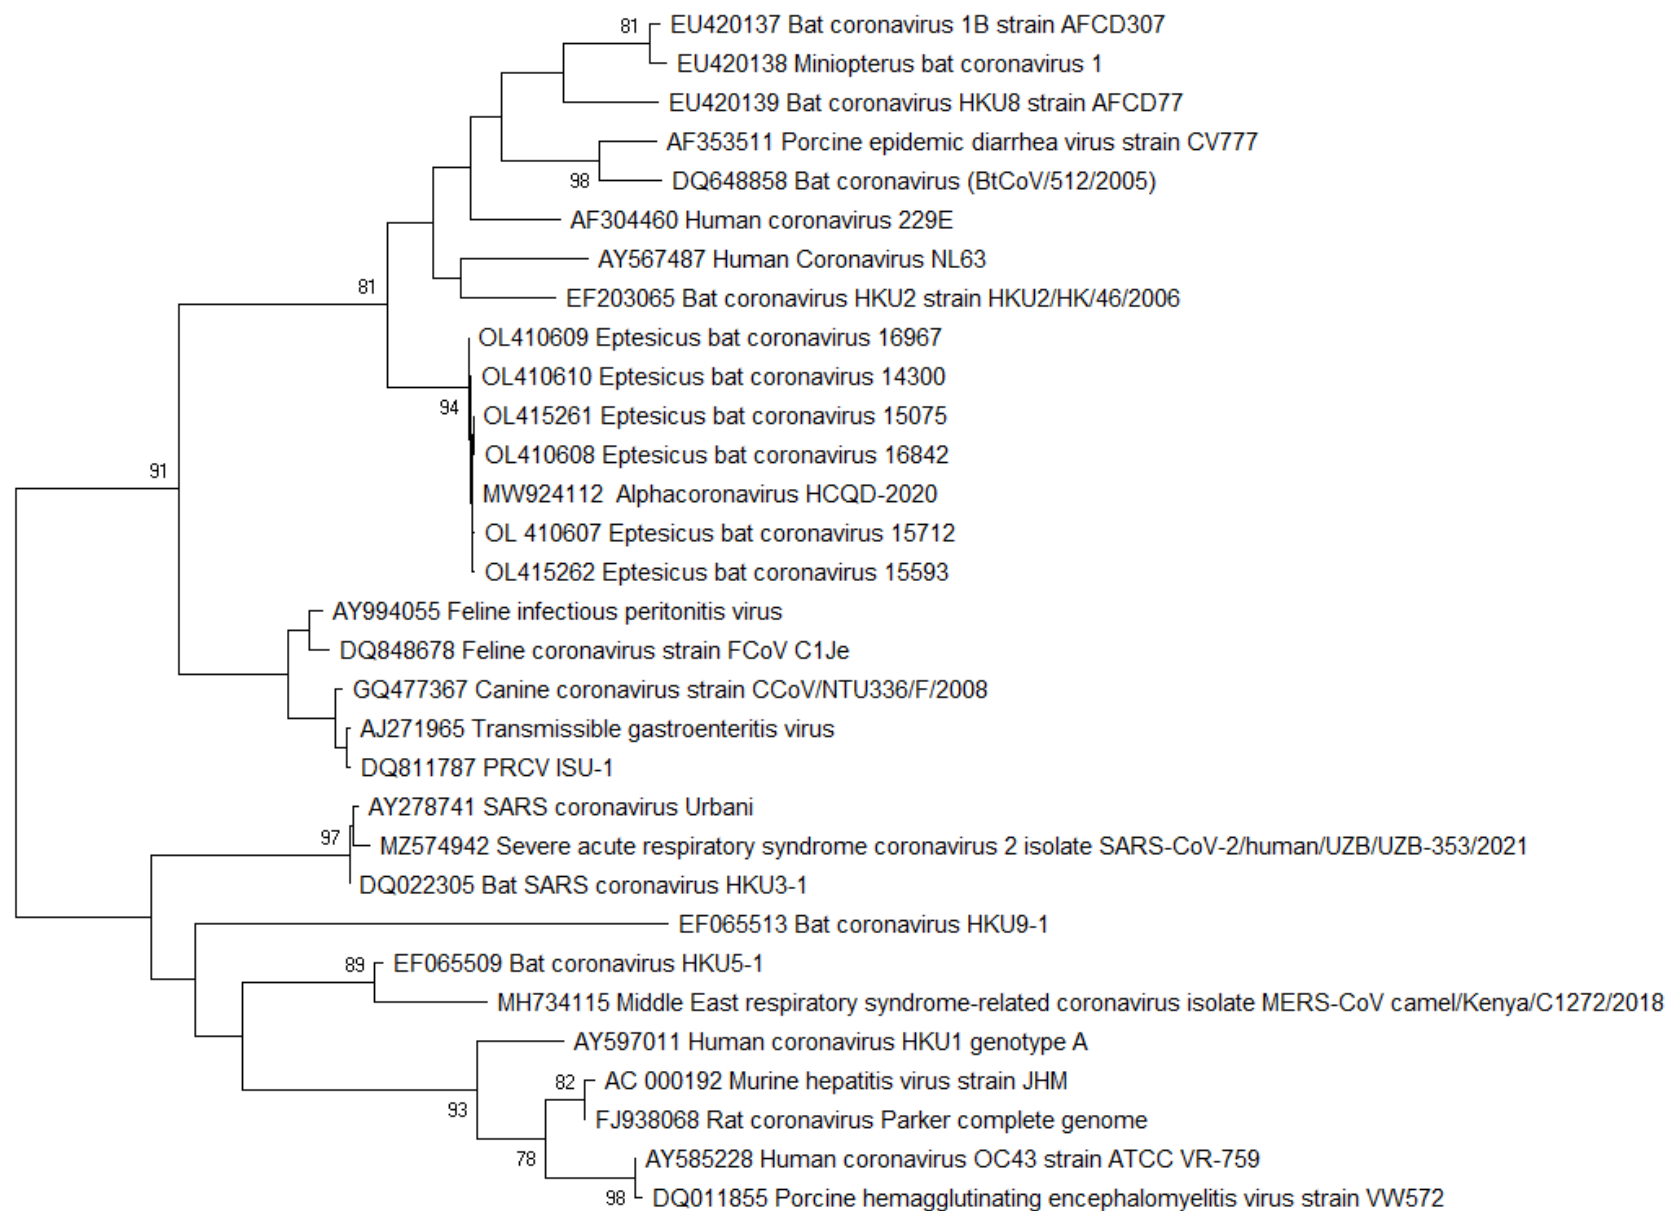

0.50

Supplement: s1 [file s1]
